# Supplementary material for: Projection of North Atlantic Oscillation and its effect on tracer transport
Source: Copernicus journal article supplement (doi:10.5194/acp-2016-399), 2016-05-20
Supplement: Supplementary file 1 [file acp-2016-399-supplement.pdf]

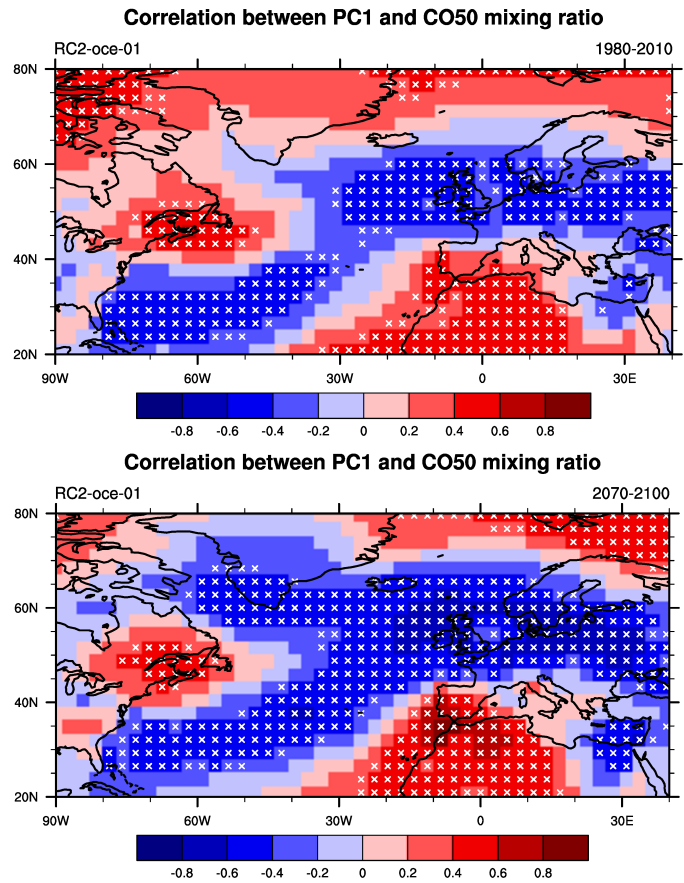

Figure 1: Correlation between the winter seasonal  $CO_{50}$  mixing ratio anomalies at the surface level and the PC1 of SLP computed with the coupled simulation data for the period (A) (*top*) and (B) (*bottom*). Points marked with a white cross indicate local significance at the 95%.
